# Supplementary figures and images for: State-dependent geometry of population activity in rat auditory cortex
Source: eLife journal article supplement (doi:10.7554/elife.44526), 2019-04-10

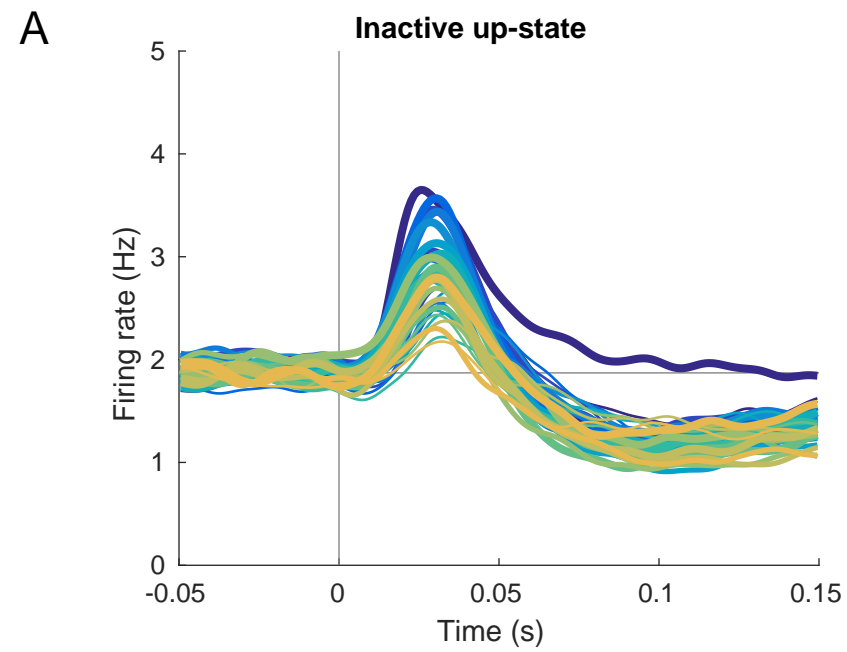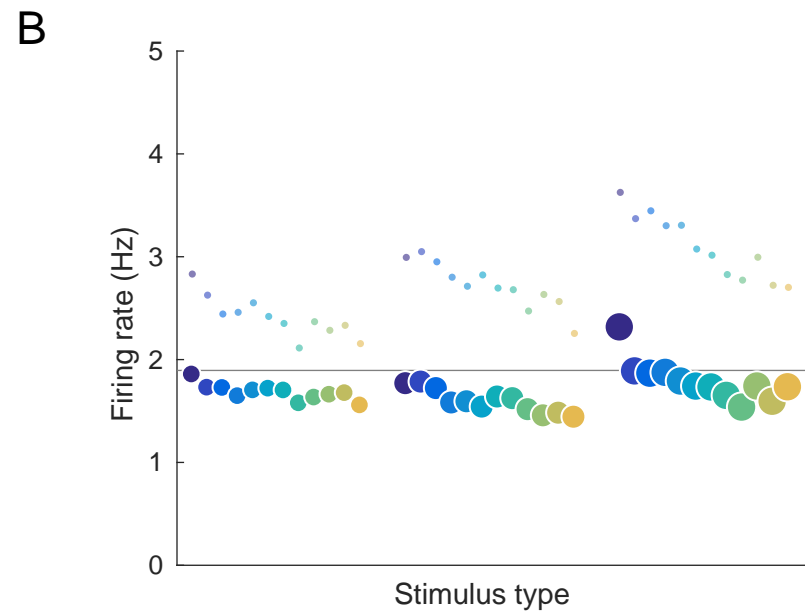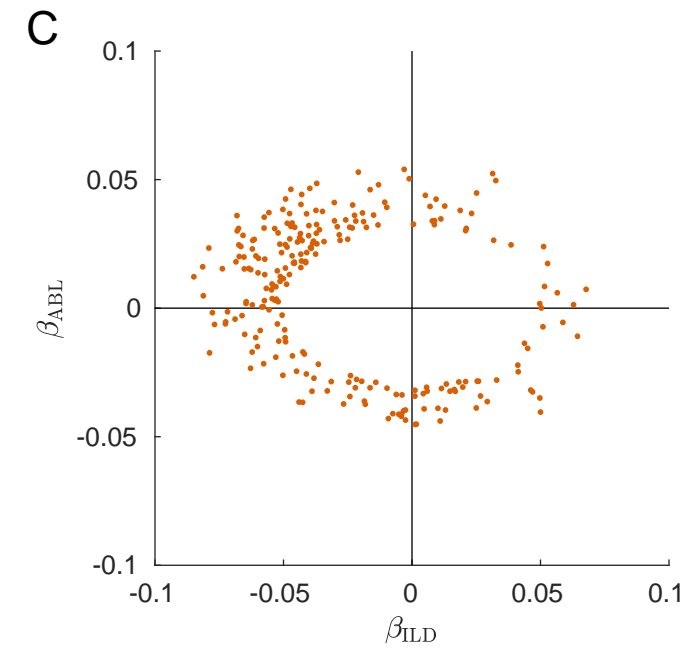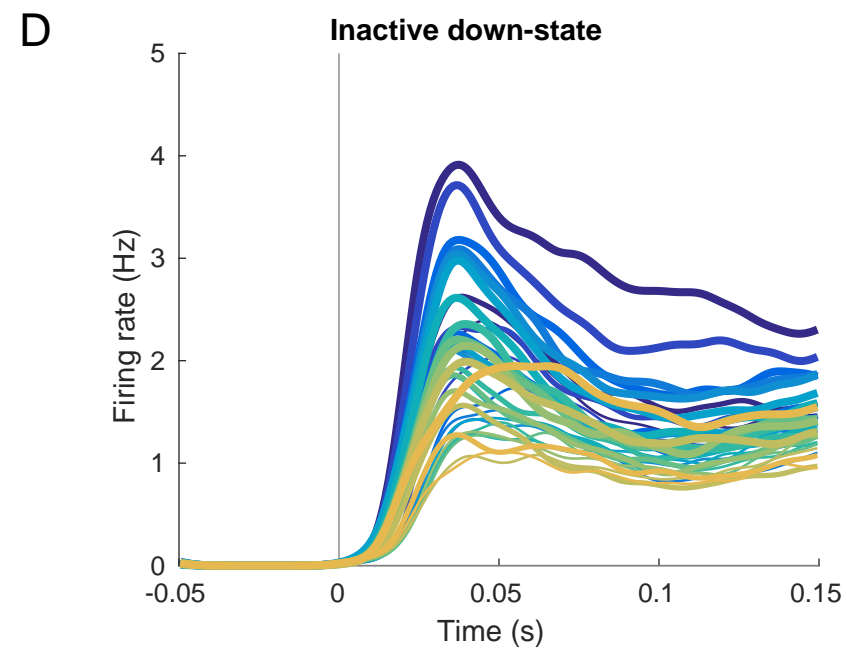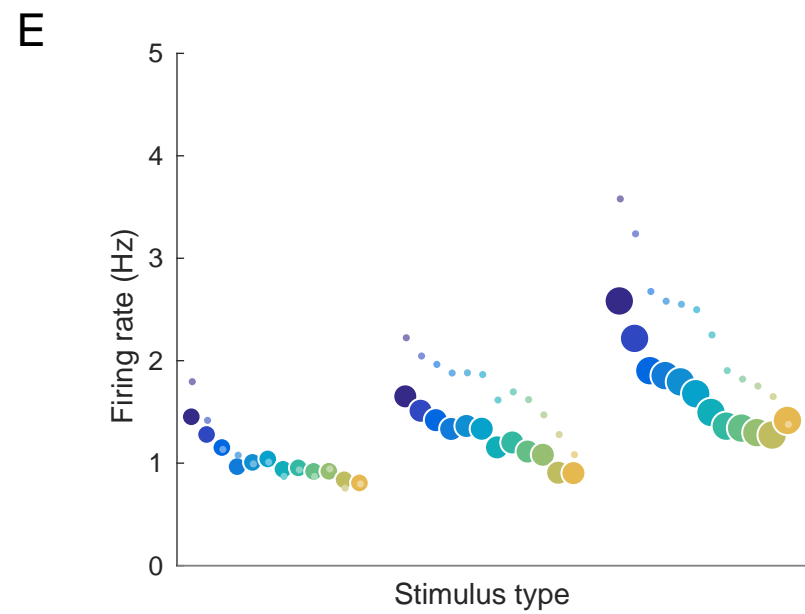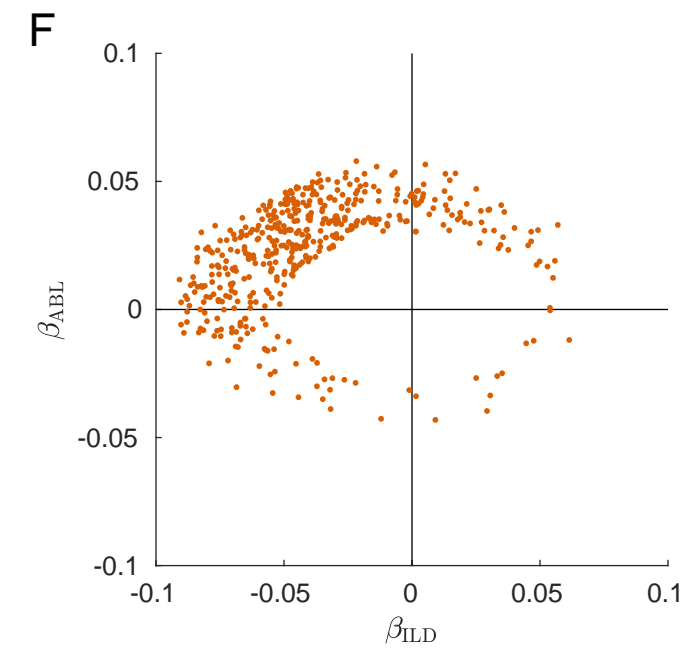

Supplement: supp [file elife_poa_e44526_Figure_2_figure_supplement_1.pdf › elife_poa_e44526_Figure_2_figure_supplement_1.pdf]

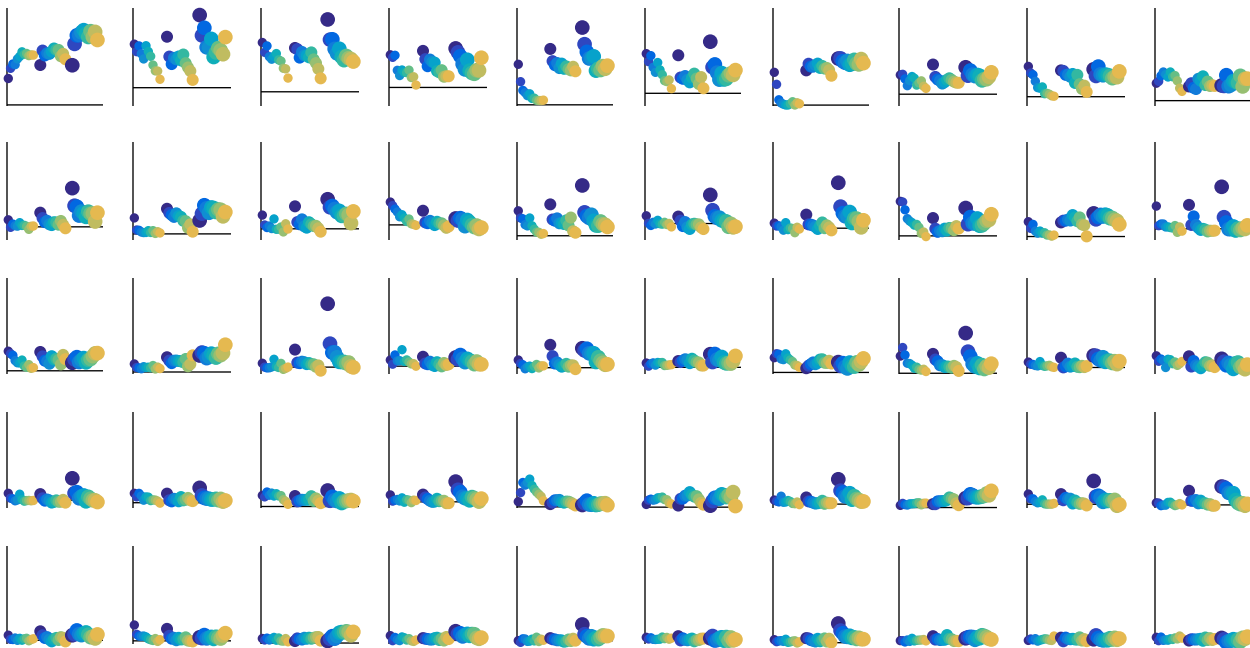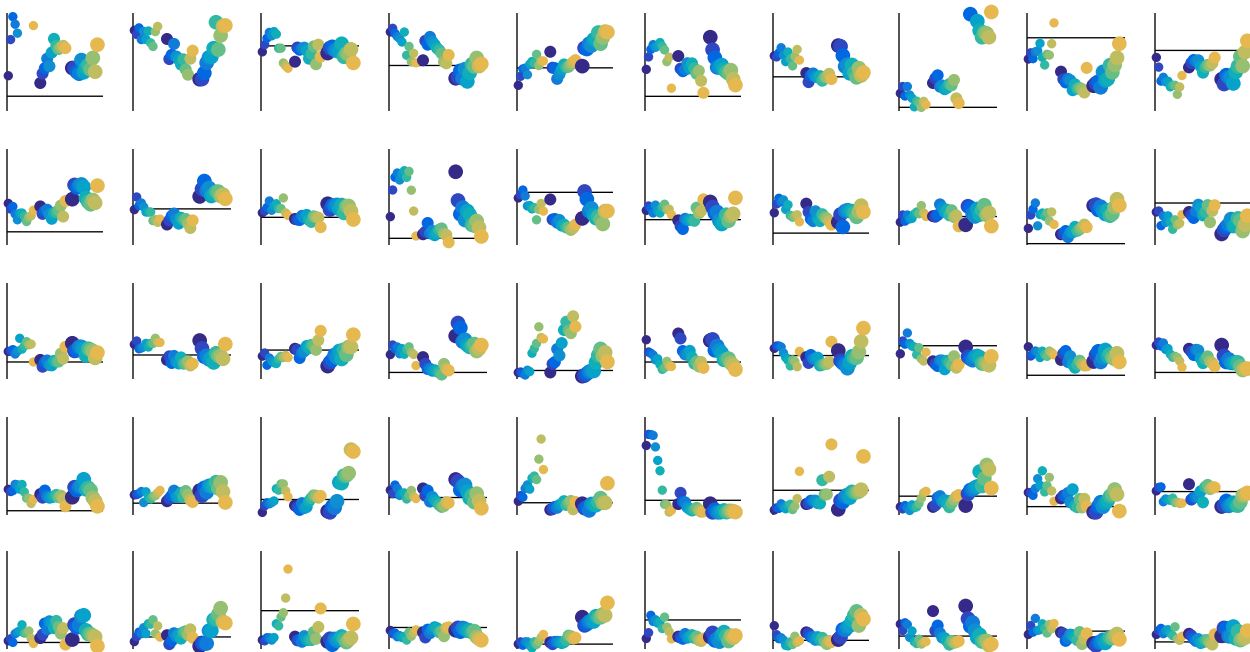

Supplement: supp [file elife_poa_e44526_Figure_2_figure_supplement_2.pdf › elife_poa_e44526_Figure_2_figure_supplement_2.pdf]

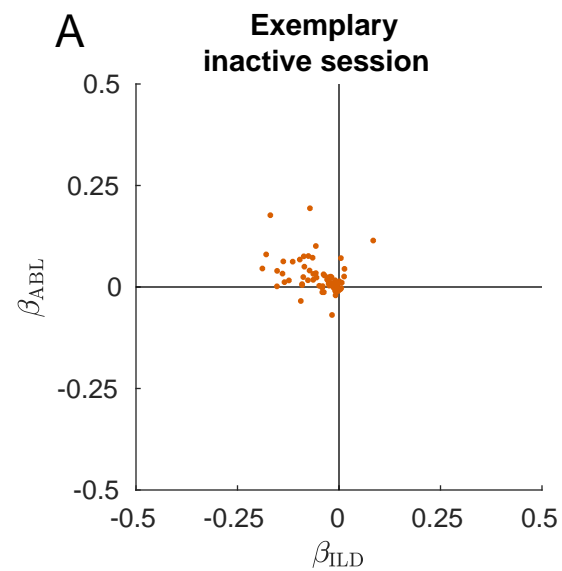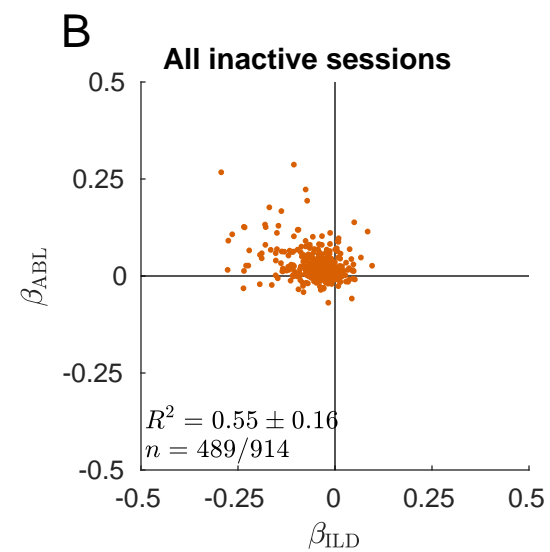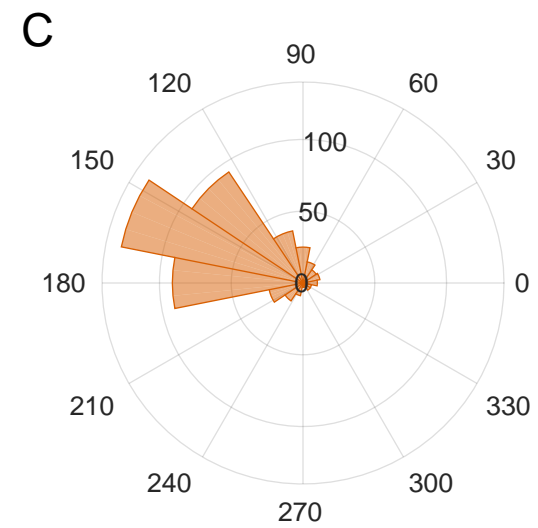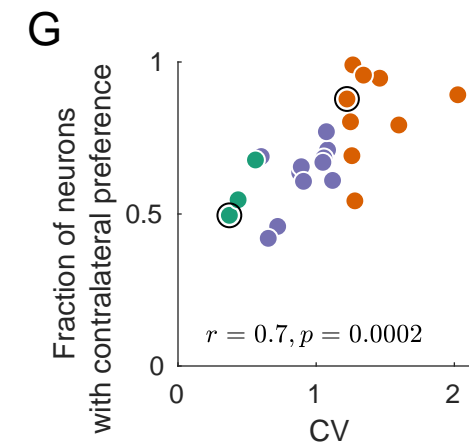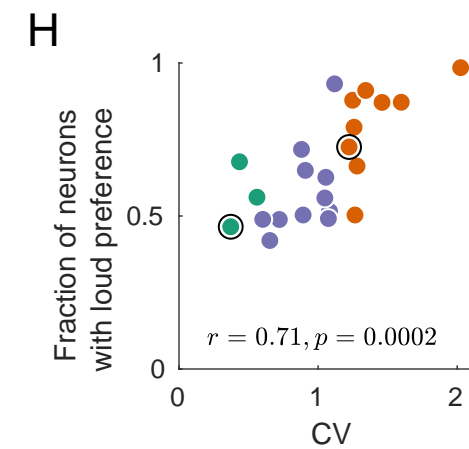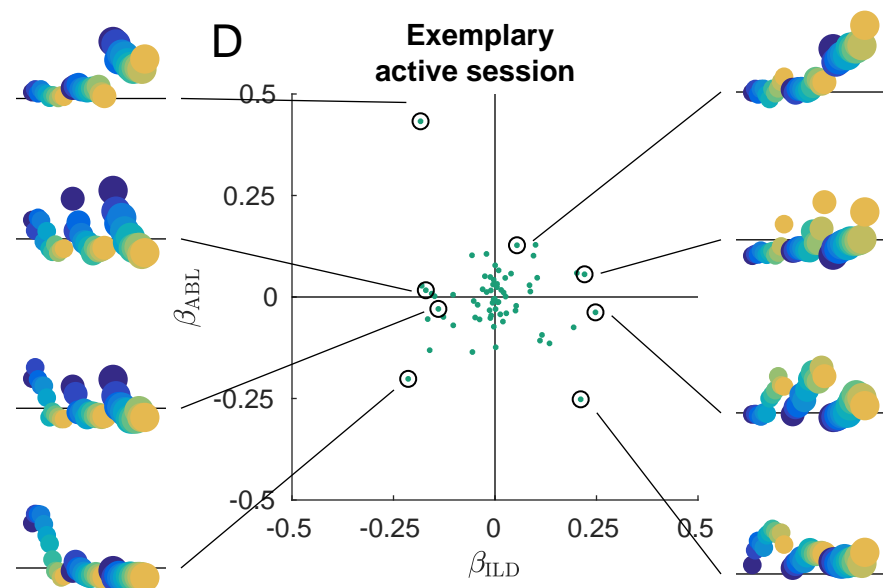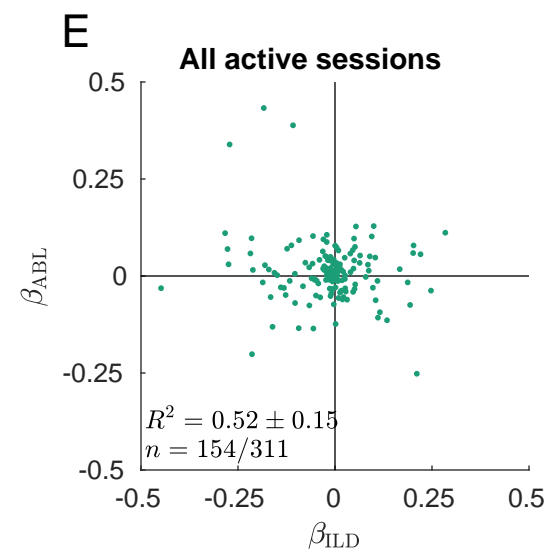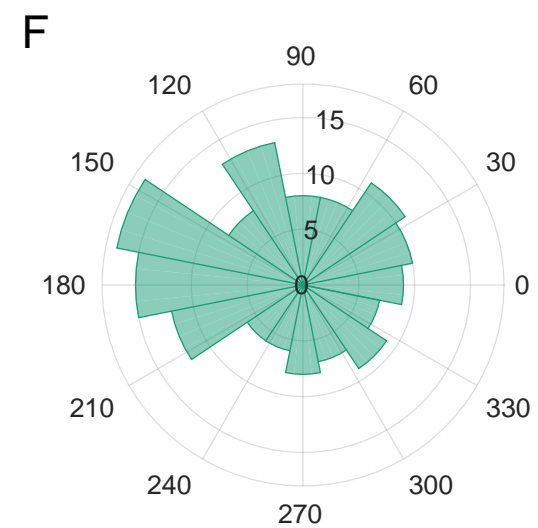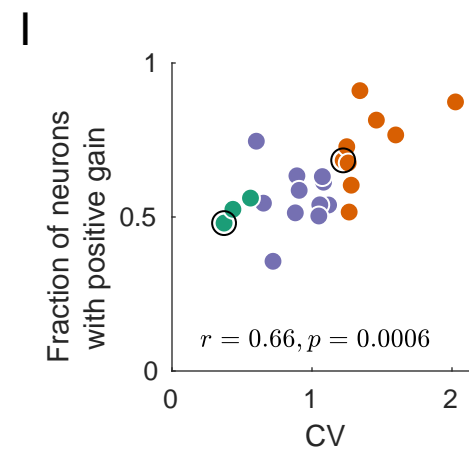

Supplement: supp [file elife_poa_e44526_Figure_3_figure_supplement_1.pdf › elife_poa_e44526_Figure_3_figure_supplement_1.pdf]

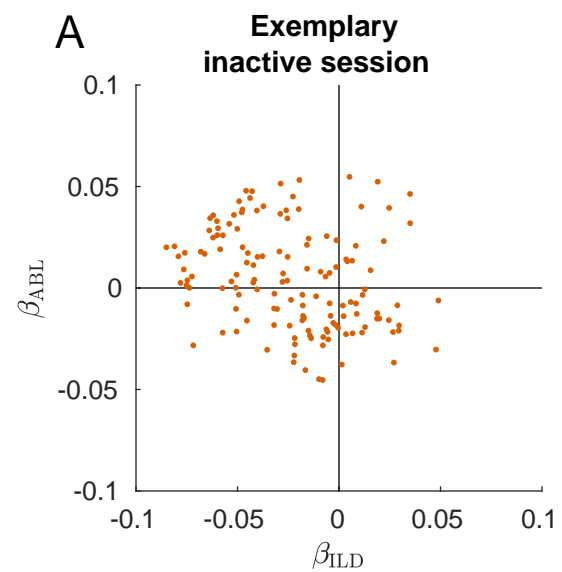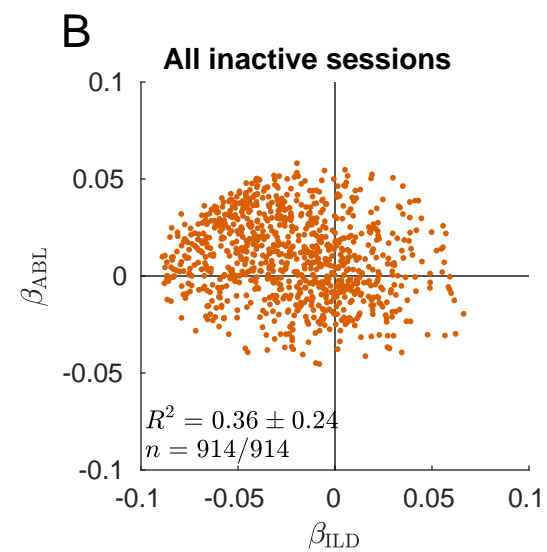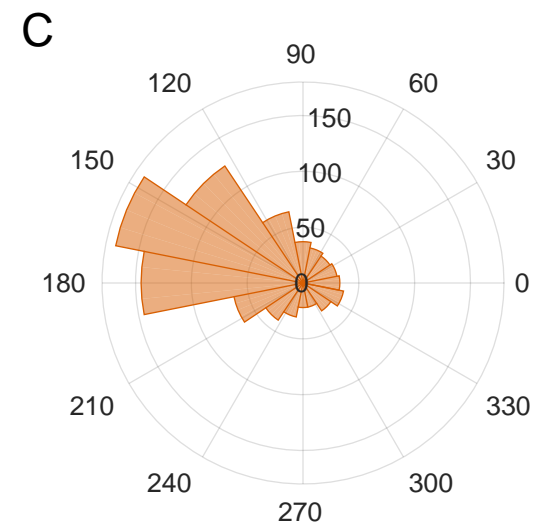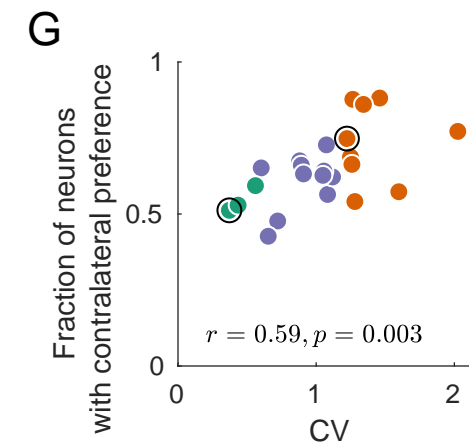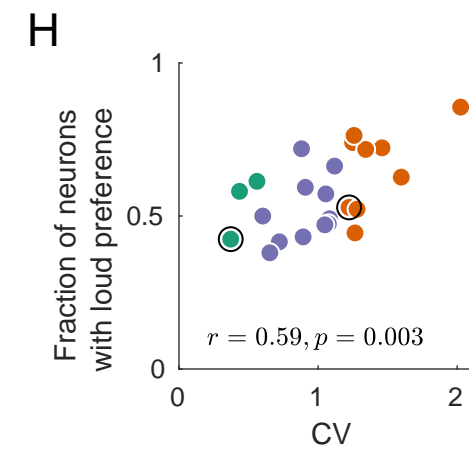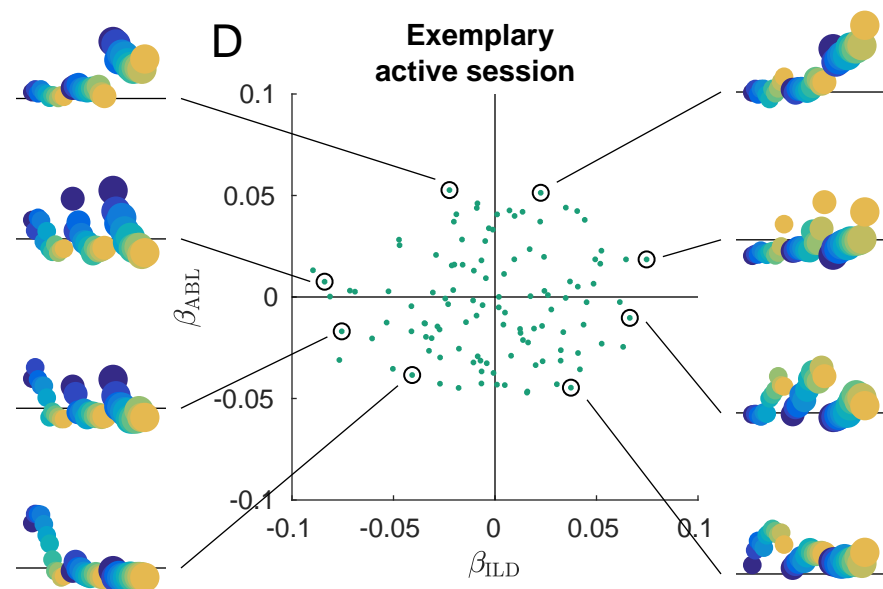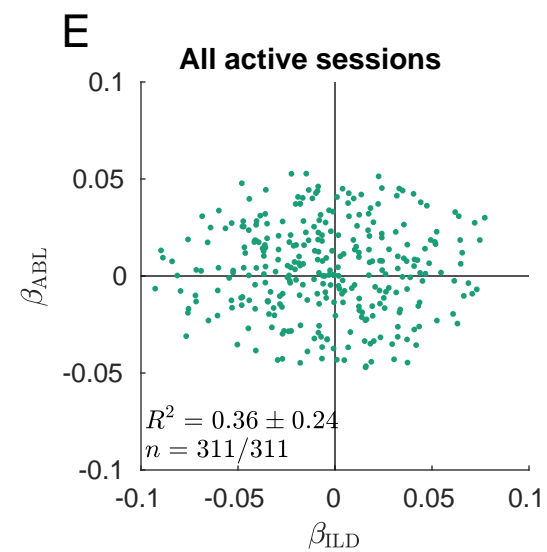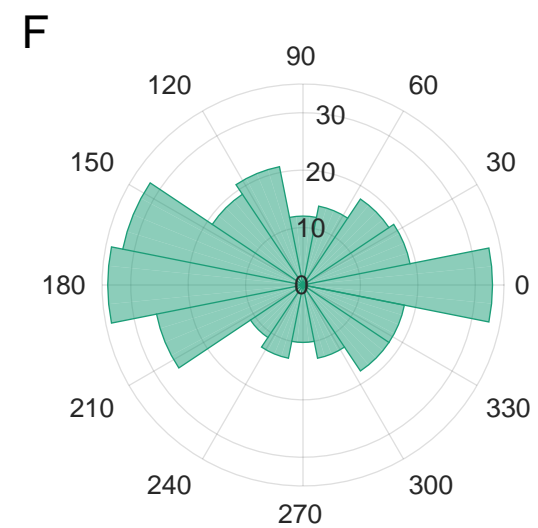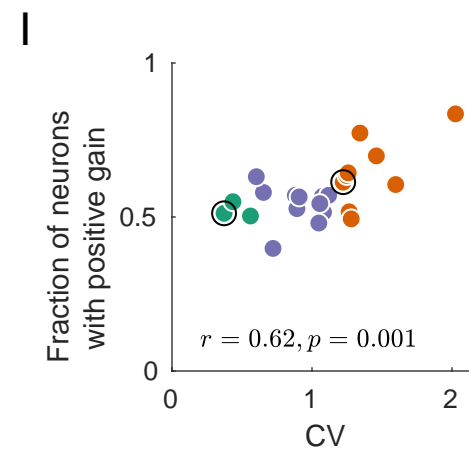

Supplement: supp [file elife_poa_e44526_Figure_3_figure_supplement_2.pdf › elife_poa_e44526_Figure_3_figure_supplement_2.pdf]

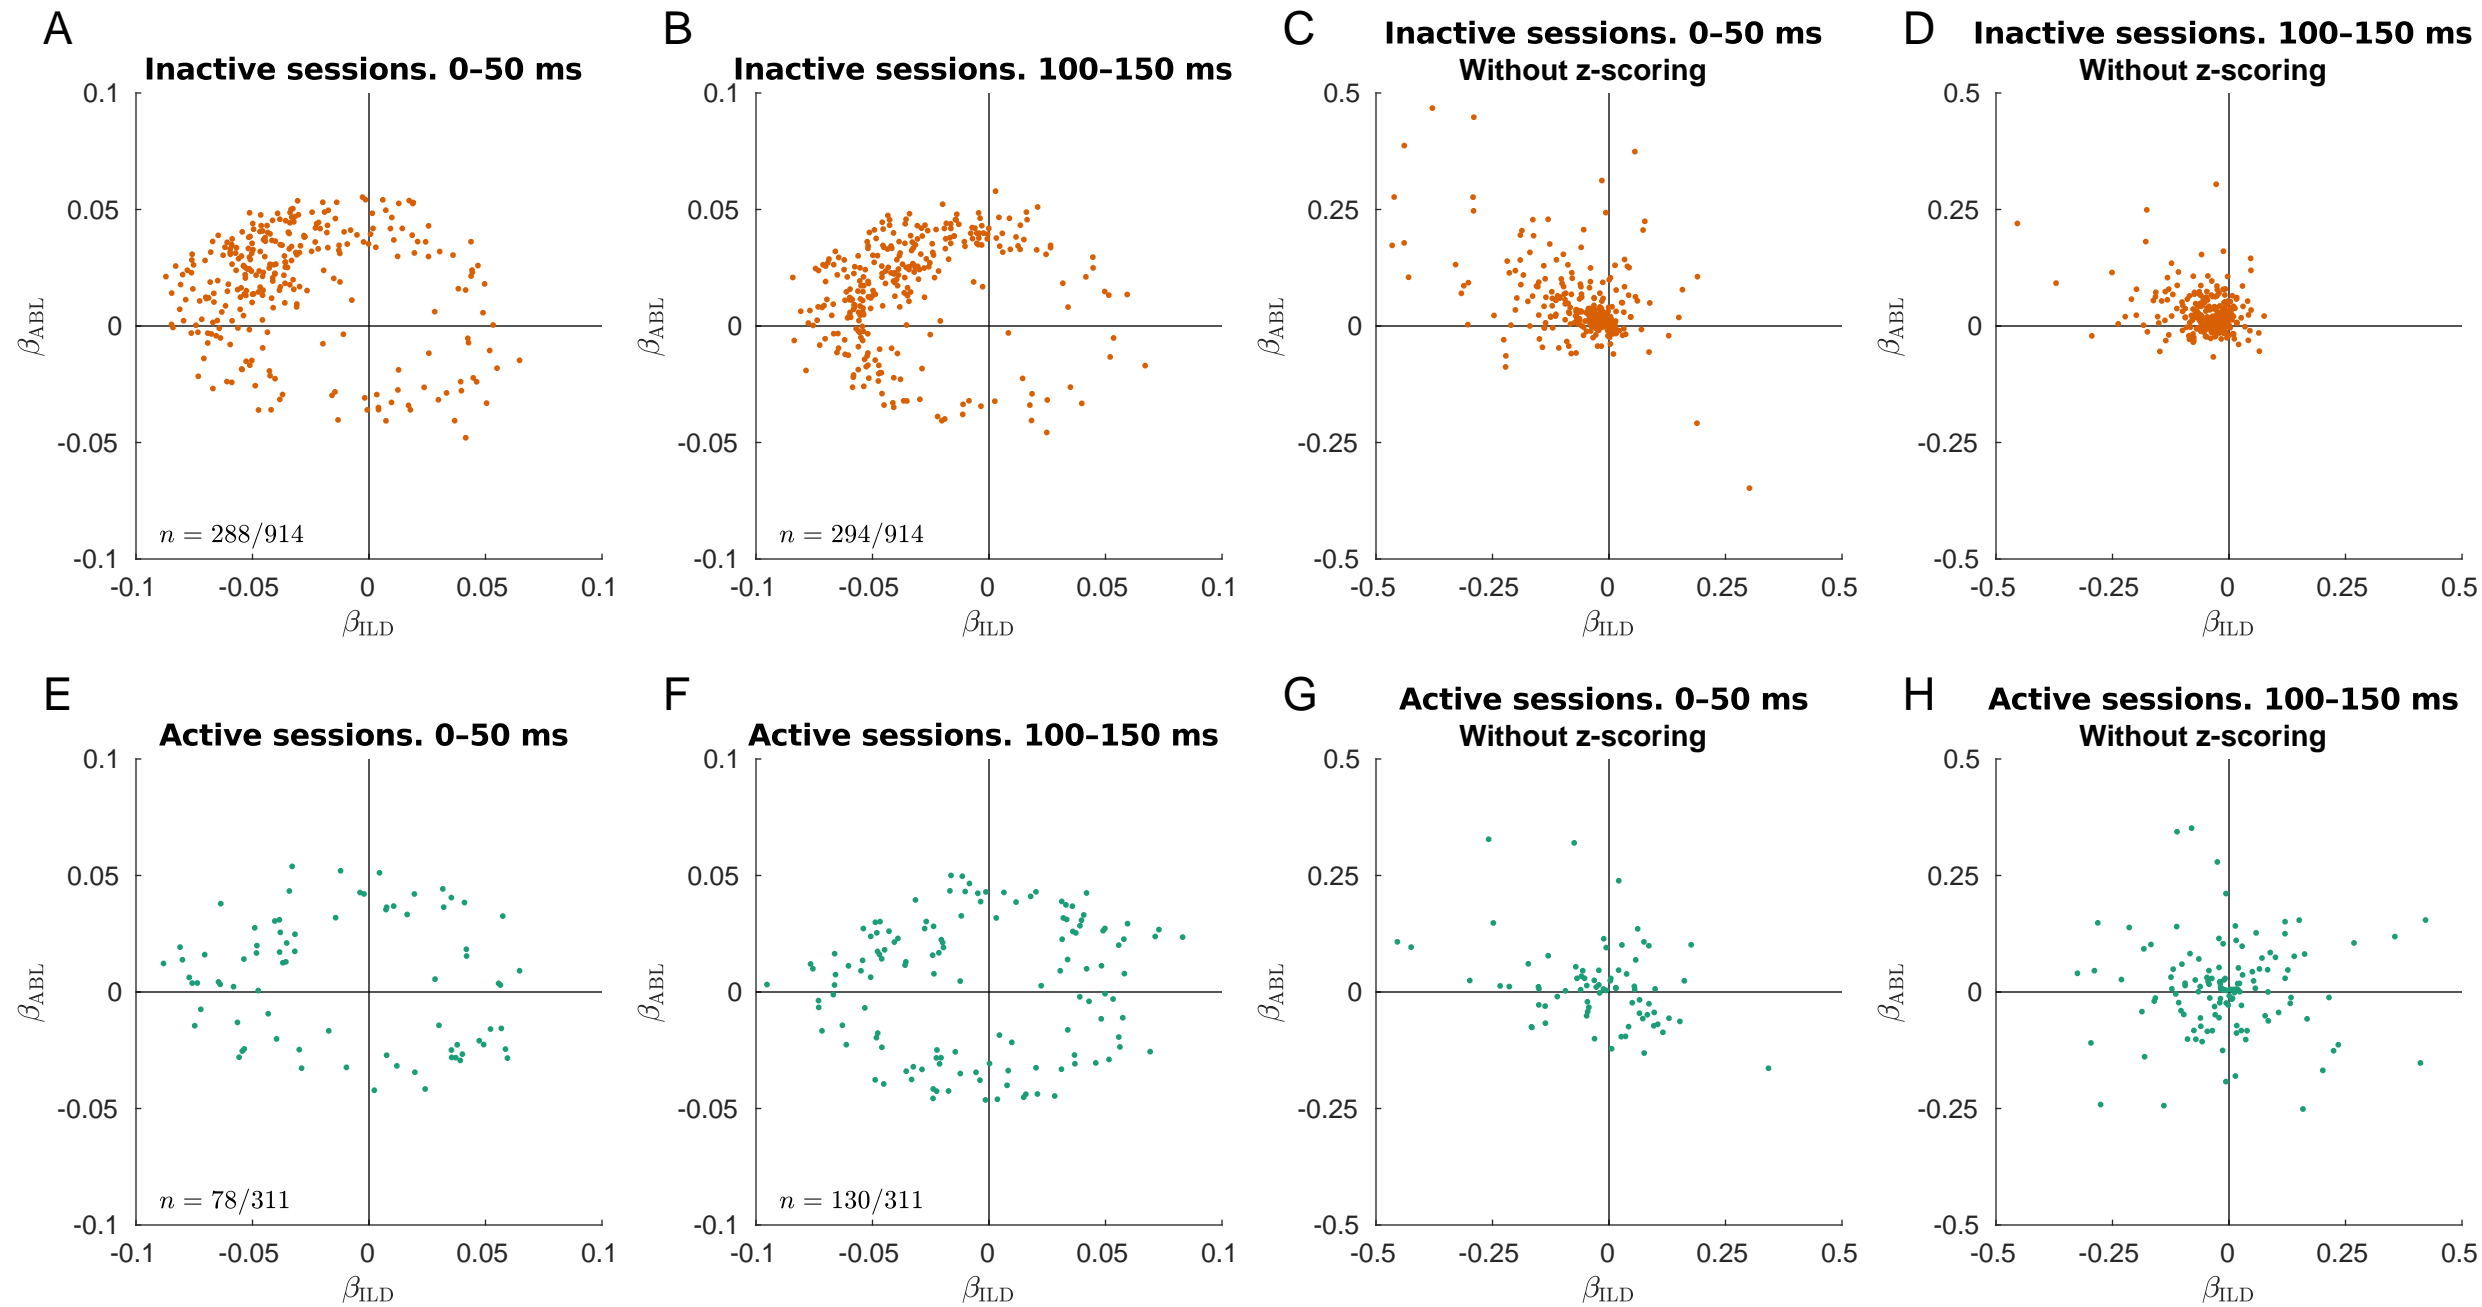

Supplement: supp [file elife_poa_e44526_Figure_3_figure_supplement_3.pdf › elife_poa_e44526_Figure_3_figure_supplement_3.pdf]

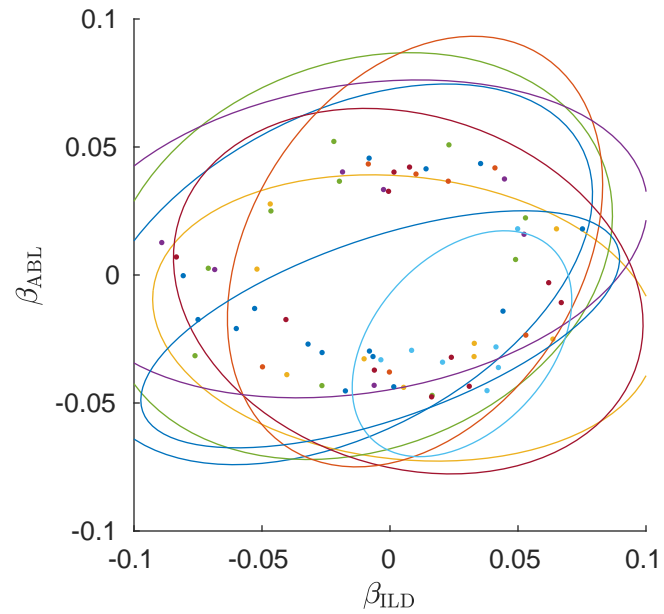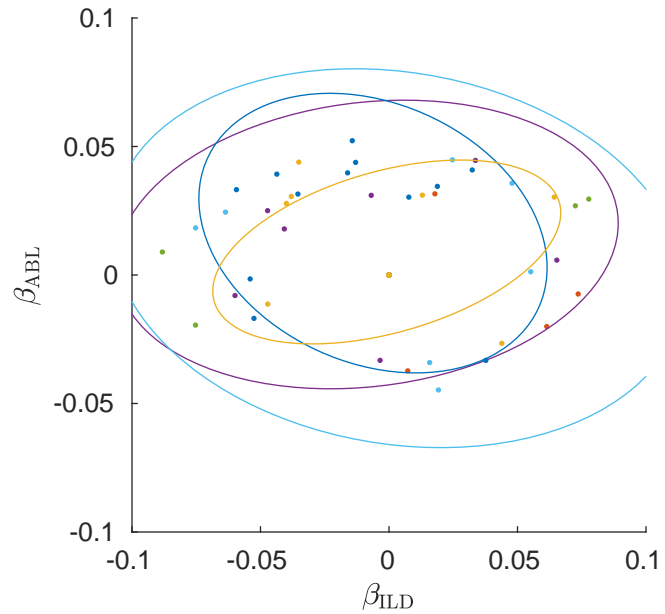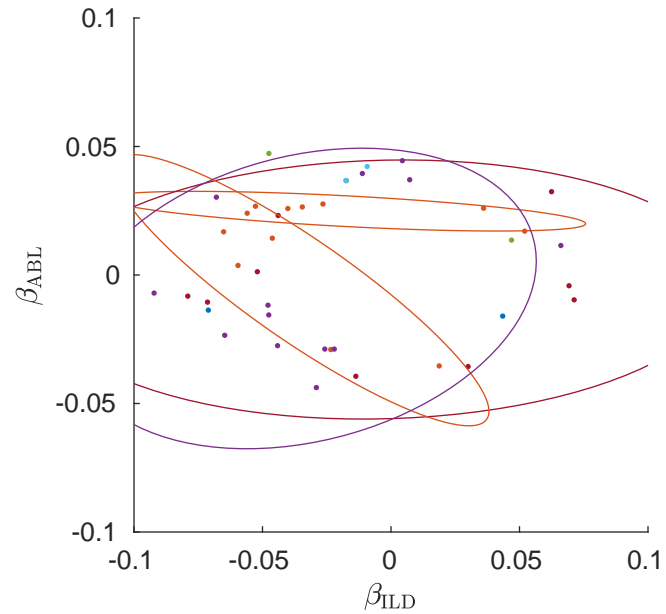

Supplement: supp [file elife_poa_e44526_Figure_3_figure_supplement_4.pdf › elife_poa_e44526_Figure_3_figure_supplement_4.pdf]

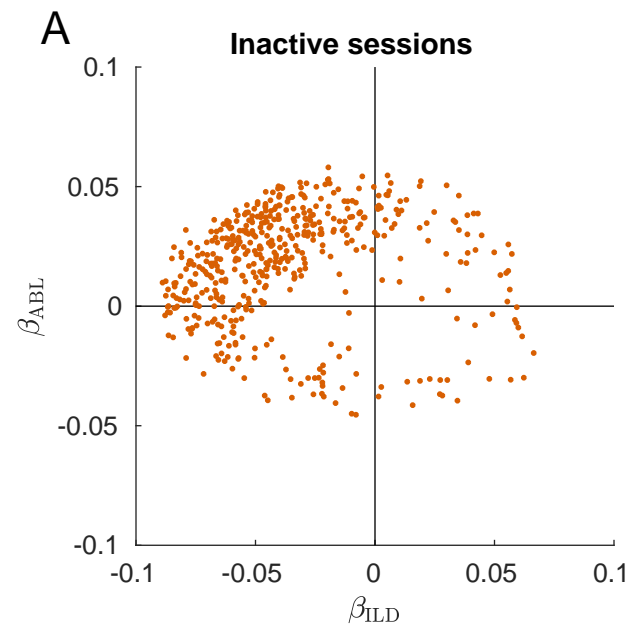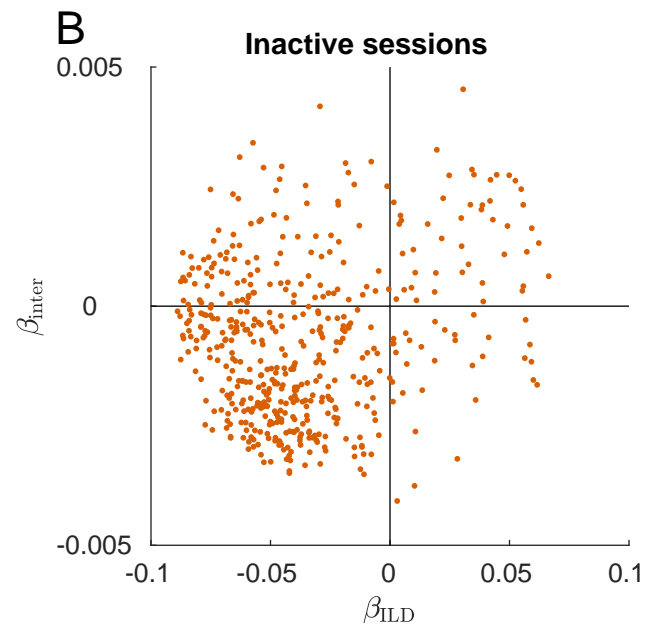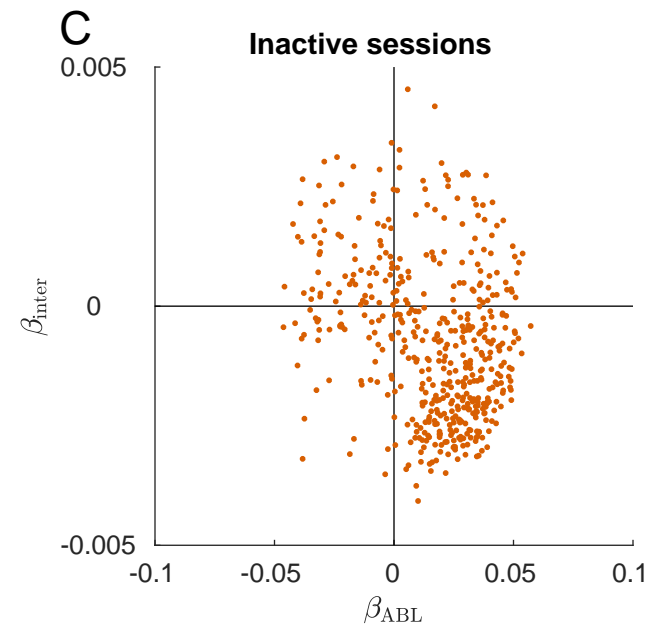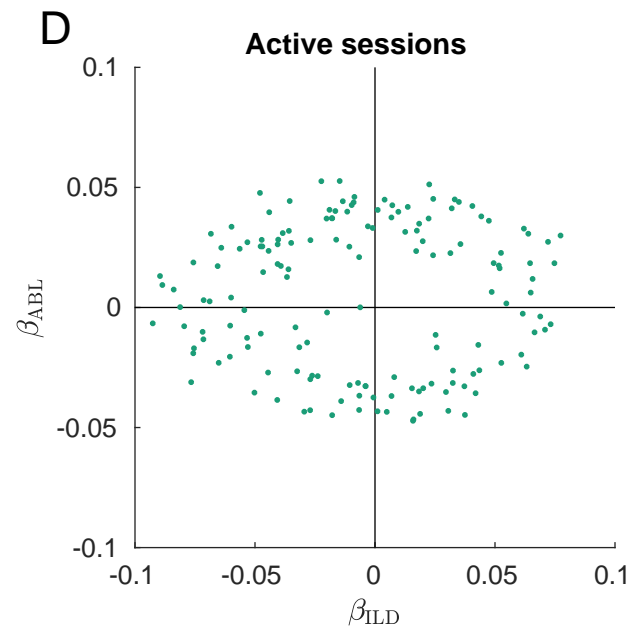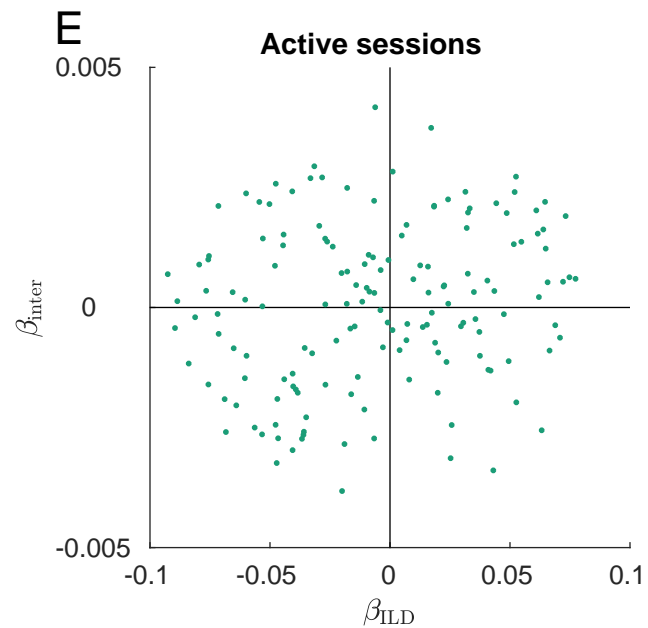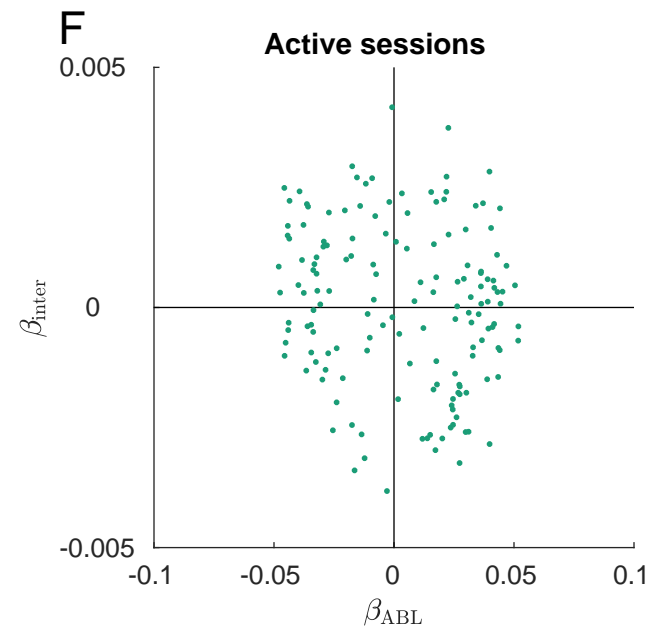

Supplement: supp [file elife_poa_e44526_Figure_3_figure_supplement_5.pdf › elife_poa_e44526_Figure_3_figure_supplement_5.pdf]

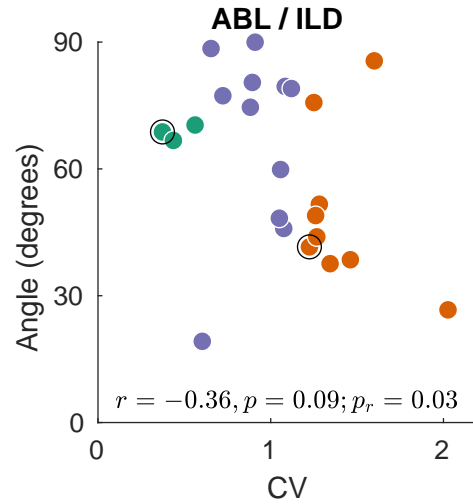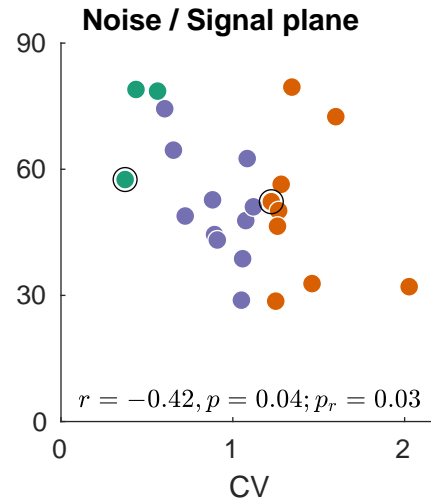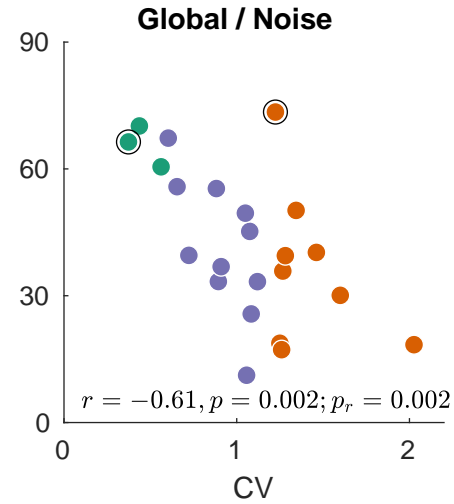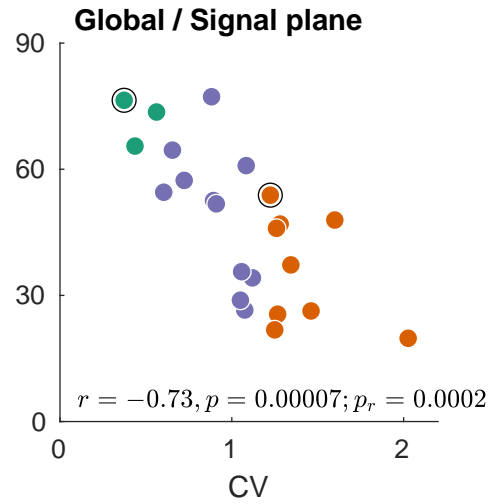

Supplement: supp [file elife_poa_e44526_Figure_5_figure_supplement_1.pdf › elife_poa_e44526_Figure_5_figure_supplement_1.pdf]

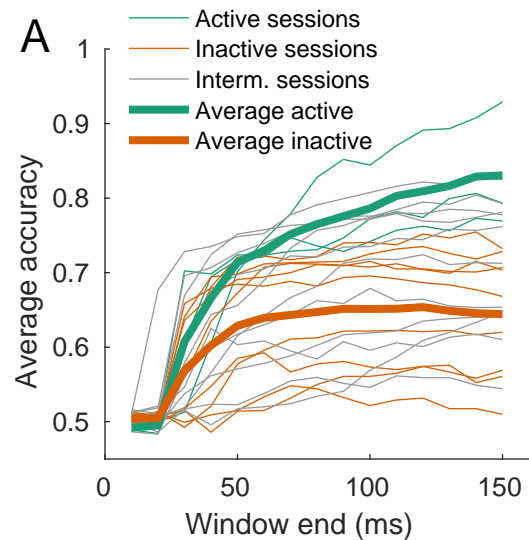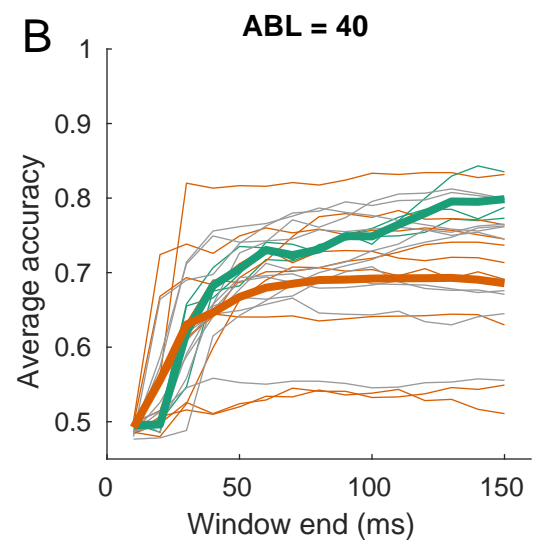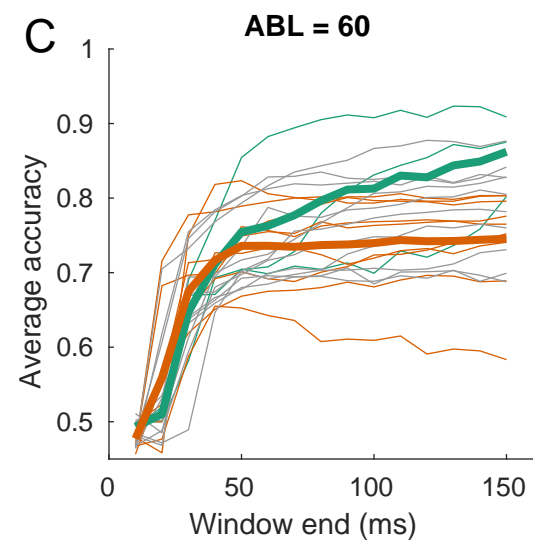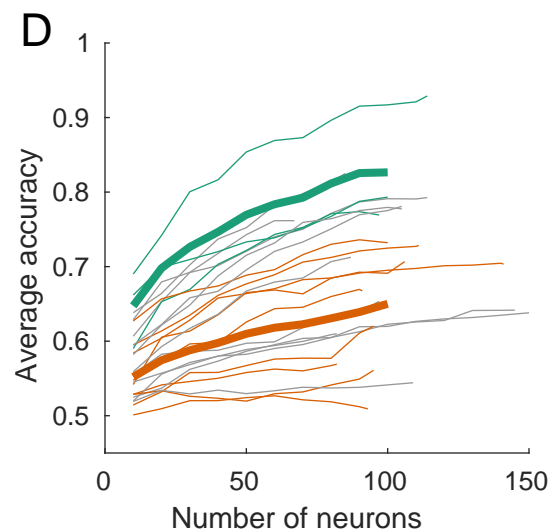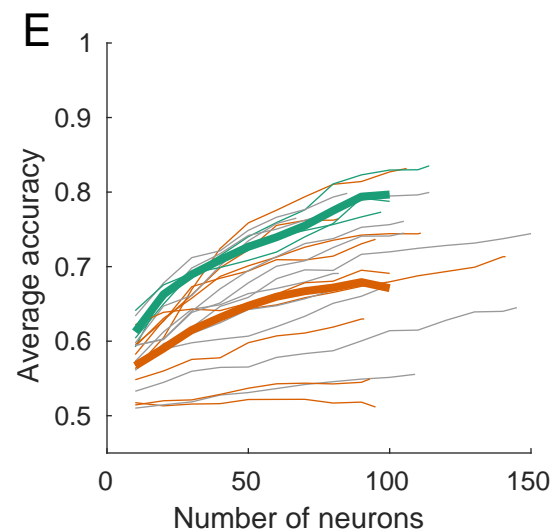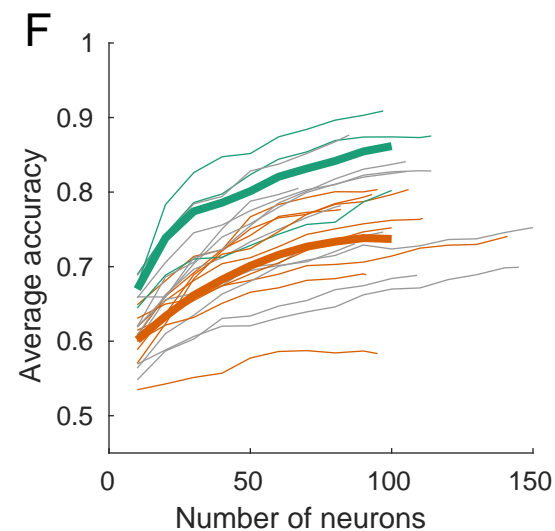

Supplement: supp [file elife_poa_e44526_Figure_6_figure_supplement_1.pdf › elife_poa_e44526_Figure_6_figure_supplement_1.pdf]

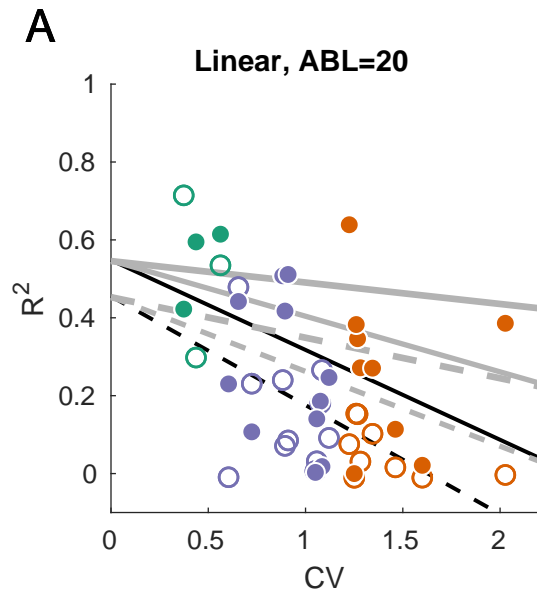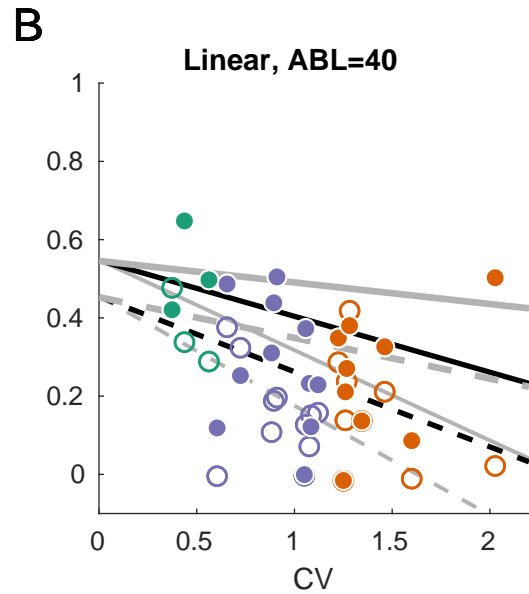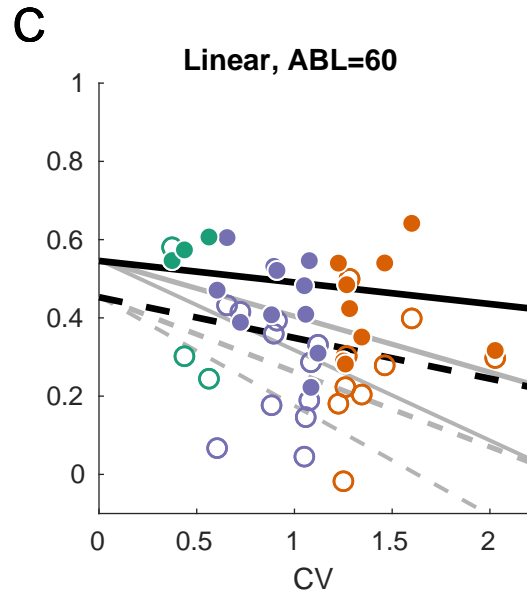

Supplement: supp [file elife_poa_e44526_Figure_6_figure_supplement_2.pdf › elife_poa_e44526_Figure_6_figure_supplement_2.pdf]
